# Supplementary material for: Aqueous phase conversion of CO2 into acetic acid over thermally transformed MIL-88B catalyst
Source: PubMed Central journal article supplement (PMC10192334; doi:10.1038/s41467-023-38506-5), 2023-05-17
Supplement: 41467_2023_38506_MOESM4_ESM.pdf [file 41467_2023_38506_MOESM4_ESM.pdf]

Reactive MD-force field: Fe/C/O/H

39 ! Number of general parameters  
 50.0000 !Overcoordination parameter  
 9.5469 !Overcoordination parameter  
 1.6725 !Valency angle conjugation parameter  
 1.7224 !Triple bond stabilisation parameter  
 6.8702 !Triple bond stabilisation parameter  
 60.4850 !C2-correction  
 1.0588 !Undercoordination parameter  
 4.6000 !Triple bond stabilisation parameter  
 12.1176 !Undercoordination parameter  
 13.3056 !Undercoordination parameter  
 -55.1978 !Triple bond stabilization energy  
 0.0000 !Lower Taper-radius  
 10.0000 !Upper Taper-radius  
 2.8793 !Not used  
 33.8667 !Valency undercoordination  
 6.0891 !Valency angle/lone pair parameter  
 1.0563 !Valency angle  
 2.0384 !Valency angle parameter  
 6.1431 !Not used  
 6.9290 !Double bond/angle parameter  
 0.3989 !Double bond/angle parameter: overcoord  
 3.9954 !Double bond/angle parameter: overcoord  
 -2.4837 !Not used  
 5.7796 !Torsion/BO parameter  
 10.0000 !Torsion overcoordination  
 1.9487 !Torsion overcoordination  
 -1.2327 !Conjugation 0 (not used)  
 2.1645 !Conjugation  
 1.5591 !vdWaals shielding  
 0.1000 !Cutoff for bond order (\*100)  
 1.7602 !Valency angle conjugation parameter  
 0.6991 !Overcoordination parameter  
 50.0000 !Overcoordination parameter  
 1.8512 !Valency/lone pair parameter  
 0.5000 !Not used  
 20.0000 !Not used  
 5.0000 !Molecular energy (not used)  
 0.0000 !Molecular energy (not used)  
 0.7903 !Valency angle conjugation parameter

8 ! Nr of atoms; cov.r; valency;a.m;Rvdw;Evdw;gammaEEM;cov.r2;#  
 alfa;gammavdW;valency;Eunder;Eover;chiEEM;etaEEM;n.u.  
 cov r3;Elp;Heat inc.;n.u.;n.u.;n.u.;n.u.  
 ov/un;val1;n.u.;val3,vval4

C 1.3817 4.0000 12.0000 1.8903 0.1838 0.9000 1.1341 4.0000  
 9.7559 2.1346 4.0000 34.9350 79.5548 5.9666 7.0000 0.0000  
 1.2114 0.0000 202.6057 8.9539 34.9289 13.5366 0.8563 0.0000  
 -2.8983 2.5000 1.0564 4.0000 2.9663 0.0000 0.0000 0.0000

H 0.8930 1.0000 1.0080 1.3550 0.0930 0.8203 -0.1000 1.0000  
 8.2230 33.2894 1.0000 0.0000 121.1250 3.7248 9.6093 1.0000  
 -0.1000 0.0000 61.6606 3.0408 2.4197 0.0003 1.0698 0.0000  
 -19.4571 4.2733 1.0338 1.0000 2.8793 0.0000 0.0000 0.0000

O 1.2450 2.0000 15.9990 2.3890 0.1000 1.0898 1.0548 6.0000  
 9.7300 13.8449 4.0000 37.5000 116.0768 8.5000 8.3122 2.0000  
 0.9049 0.4056 59.0626 3.5027 0.7640 0.0021 0.9745 0.0000  
 -3.5500 2.9000 1.0493 4.0000 2.9225 0.0000 0.0000 0.0000

|    |                                                       |          |          |         |          |         |         |         |        |
|----|-------------------------------------------------------|----------|----------|---------|----------|---------|---------|---------|--------|
| Fe | 1.9306                                                | 3.0000   | 55.8450  | 2.1229  | 0.1163   | 0.4744  | -1.6836 | 3.0000  |        |
|    | 10.4193                                               | 7.0680   | 3.0000   | 0.0000  | 18.3725  | 1.7785  | 8.6281  | 0.0000  |        |
|    | -1.2000                                               | 0.0000   | 66.4838  | 25.3430 | 10.1260  | 0.7590  | 0.8563  | 0.0000  |        |
|    | -16.0573                                              | 2.6997   | 1.0338   | 6.0000  | 2.5791   | 0.0000  | 0.0000  | 0.0000  |        |
| Cl | 1.7140                                                | 1.0000   | 35.4500  | 1.9139  | 0.2000   | 0.3837  | -1.0000 | 7.0000  |        |
|    | 11.5345                                               | 10.1330  | 1.0000   | 0.0000  | 0.0000   | 9.9614  | 6.5316  | 0.0000  |        |
|    | -1.0000                                               | 3.5750   | 143.1770 | 6.2293  | 5.2294   | 0.1542  | 0.8563  | 0.0000  |        |
|    | -10.2080                                              | 2.9867   | 1.0338   | 6.2998  | 2.5791   | 0.0000  | 0.0000  | 0.0000  |        |
| Si | 2.1932                                                | 4.0000   | 28.0600  | 1.8951  | 0.1737   | 0.8112  | 1.2962  | 4.0000  |        |
|    | 11.3429                                               | 5.2054   | 4.0000   | 21.7115 | 139.9309 | 4.0081  | 5.7104  | 0.0000  |        |
|    | -1.0000                                               | 0.0000   | 128.2031 | 9.0751  | 23.8188  | 0.8381  | 0.8563  | 0.0000  |        |
|    | -4.1684                                               | 2.0754   | 1.0338   | 4.0000  | 2.5791   | 1.4000  | 0.2000  | 13.0000 |        |
| Al | 2.1967                                                | 3.0000   | 26.9820  | 2.3738  | 0.2328   | 0.4265  | -1.6836 | 3.0000  |        |
|    | 9.4002                                                | 3.9009   | 3.0000   | 0.0076  | 16.5151  | 1.7429  | 6.8319  | 0.0000  |        |
|    | -1.0000                                               | 0.0000   | 78.4675  | 20.0000 | 0.2500   | 0.0000  | 0.8563  | 0.0000  |        |
|    | -22.7101                                              | 1.7045   | 1.0338   | 8.0000  | 2.5791   | 1.4000  | 0.2000  | 13.0000 |        |
| X  | -0.1000                                               | 2.0000   | 1.0080   | 2.0000  | 0.0000   | 0.4744  | -0.1000 | 6.0000  |        |
|    | 10.0000                                               | 2.5000   | 4.0000   | 0.0000  | 0.0000   | 4.0000  | 15.0000 | 0.0000  |        |
|    | -0.1000                                               | 0.0000   | 127.6226 | 8.7410  | 13.3640  | 0.6690  | 0.9745  | 0.0000  |        |
|    | -11.0000                                              | 2.7466   | 1.0338   | 6.2998  | 2.8793   | 0.0000  | 0.0000  | 0.0000  |        |
| 25 | ! Nr of bonds; Edis1;LPpen;n.u.;pbe1;pbo5;13corr;pbo6 |          |          |         |          |         |         |         |        |
|    | pbe2;pbo3;pbo4;Etrip;pbo1;pbo2;ovcorr                 |          |          |         |          |         |         |         |        |
| 1  | 1                                                     | 158.2004 | 99.1897  | 78.0000 | -0.7738  | -0.4550 | 1.0000  | 37.6117 | 0.4147 |
|    |                                                       | 0.4590   | -0.1000  | 9.1628  | 1.0000   | -0.0777 | 6.7268  | 1.0000  | 0.0000 |
| 1  | 2                                                     | 169.4760 | 0.0000   | 0.0000  | -0.6083  | 0.0000  | 1.0000  | 6.0000  | 0.7652 |
|    |                                                       | 5.2290   | 1.0000   | 0.0000  | 1.0000   | -0.0500 | 6.9136  | 0.0000  | 0.0000 |
| 2  | 2                                                     | 153.3934 | 0.0000   | 0.0000  | -0.4600  | 0.0000  | 1.0000  | 6.0000  | 0.7300 |
|    |                                                       | 6.2500   | 1.0000   | 0.0000  | 1.0000   | -0.0790 | 6.0552  | 0.0000  | 0.0000 |
| 1  | 3                                                     | 164.4303 | 82.6772  | 60.8077 | -0.3739  | -0.2351 | 1.0000  | 10.5036 | 1.0000 |
|    |                                                       | 0.4475   | -0.2288  | 7.0250  | 1.0000   | -0.1363 | 4.8734  | 0.0000  | 0.0000 |
| 3  | 3                                                     | 142.2858 | 145.0000 | 50.8293 | 0.2506   | -0.1000 | 1.0000  | 29.7503 | 0.6051 |
|    |                                                       | 0.3451   | -0.1055  | 9.0000  | 1.0000   | -0.1225 | 5.5000  | 1.0000  | 0.0000 |
| 2  | 3                                                     | 160.0000 | 0.0000   | 0.0000  | -0.5725  | 0.0000  | 1.0000  | 6.0000  | 0.5626 |
|    |                                                       | 1.1150   | 1.0000   | 0.0000  | 0.0000   | -0.0920 | 4.2790  | 0.0000  | 0.0000 |
| 1  | 4                                                     | 113.1509 | 0.0000   | 0.0000  | 0.6400   | -0.3000 | 1.0000  | 36.0000 | 0.0100 |
|    |                                                       | 1.0000   | -0.3500  | 15.0000 | 1.0000   | -0.1450 | 4.1504  | 1.0000  | 0.0000 |
| 2  | 4                                                     | 78.2669  | 0.0000   | 0.0000  | 0.4668   | 0.0000  | 1.0000  | 6.0000  | 0.1766 |
|    |                                                       | 0.5673   | 1.0000   | 0.0000  | 1.0000   | -0.1543 | 5.4965  | 0.0000  | 0.0000 |
| 3  | 4                                                     | 77.2864  | 0.0000   | 0.0000  | 0.3288   | -0.3000 | 1.0000  | 36.0000 | 0.1023 |
|    |                                                       | 1.0000   | -0.3500  | 15.0000 | 1.0000   | -0.1109 | 7.6514  | 1.0000  | 0.0000 |
| 4  | 4                                                     | 44.2147  | 0.0000   | 0.0000  | 0.2236   | -0.2000 | 0.0000  | 16.0000 | 0.2849 |
|    |                                                       | 0.4922   | -0.2000  | 15.0000 | 1.0000   | -0.0552 | 6.7583  | 0.0000  | 0.0000 |
| 2  | 5                                                     | 109.1686 | 0.0000   | 0.0000  | -0.1657  | -0.2000 | 0.0000  | 16.0000 | 1.2500 |
|    |                                                       | 2.8463   | -0.2000  | 15.0000 | 1.0000   | -0.1111 | 5.2687  | 0.0000  | 0.0000 |
| 3  | 5                                                     | 0.0000   | 0.0000   | 0.0000  | 0.5000   | -0.2000 | 0.0000  | 16.0000 | 0.5000 |
|    |                                                       | 1.0001   | -0.2000  | 15.0000 | 1.0000   | -0.1000 | 10.0000 | 0.0000  | 0.0000 |
| 4  | 5                                                     | 0.0000   | 0.0000   | 0.0000  | 0.2500   | -0.2000 | 0.0000  | 16.0000 | 0.5000 |
|    |                                                       | 0.5000   | -0.2000  | 15.0000 | 1.0000   | -0.2000 | 10.0000 | 0.0000  | 0.0000 |
| 5  | 5                                                     | 0.2500   | 0.0000   | 0.0000  | 0.1803   | -0.2000 | 0.0000  | 16.0000 | 0.3356 |
|    |                                                       | 0.9228   | -0.2000  | 15.0000 | 1.0000   | -0.1178 | 5.6715  | 0.0000  | 0.0000 |
| 1  | 6                                                     | 0.0000   | 0.0000   | 0.0000  | -0.6528  | -0.3000 | 0.0000  | 36.0000 | 0.5000 |
|    |                                                       | 10.0663  | -0.3500  | 25.0000 | 1.0000   | -0.1000 | 10.0000 | 0.0000  | 0.0000 |
| 2  | 6                                                     | 250.0000 | 0.0000   | 0.0000  | -0.7128  | 0.0000  | 1.0000  | 6.0000  | 0.1186 |
|    |                                                       | 18.5790  | 1.0000   | 0.0000  | 1.0000   | -0.0731 | 7.4983  | 0.0000  | 0.0000 |
| 3  | 6                                                     | 261.9074 | 5.9533   | 0.0000  | -0.6223  | -0.3000 | 1.0000  | 36.0000 | 0.7275 |
|    |                                                       | 10.1541  | -0.2366  | 29.7817 | 1.0000   | -0.1083 | 8.5924  | 6.0658  | 0.0000 |
| 4  | 6                                                     | 0.0000   | 0.0000   | 0.0000  | 1.0000   | 0.3000  | 0.0000  | 26.0000 | 1.0000 |

|    |                                                            |          |         |         |         |          |         |          |        |        |
|----|------------------------------------------------------------|----------|---------|---------|---------|----------|---------|----------|--------|--------|
|    |                                                            |          | 0.5000  | 0.0000  | 12.0000 | 1.0000   | -0.2000 | 10.0000  | 0.0000 | 0.0000 |
| 6  | 6                                                          | 70.9120  | 54.0531 | 30.0000 | 0.4931  | -0.3000  | 1.0000  | 16.0000  | 0.0392 |        |
|    |                                                            |          | 0.2476  | -0.8055 | 7.1248  | 1.0000   | -0.1009 | 8.7229   | 0.0000 | 0.0000 |
| 1  | 7                                                          | 0.0000   | 0.0000  | 0.0000  | -0.6528 | -0.3000  | 0.0000  | 36.0000  | 0.5000 |        |
|    |                                                            |          | 10.0663 | -0.3500 | 25.0000 | 1.0000   | -0.1000 | 10.0000  | 0.0000 | 0.0000 |
| 2  | 7                                                          | 0.8579   | 0.0000  | 0.0000  | -0.6528 | -0.3000  | 0.0000  | 36.0000  | 0.1551 |        |
|    |                                                            |          | 10.0663 | -0.3500 | 25.0000 | 1.0000   | -0.0842 | 7.1758   | 0.0000 | 0.0000 |
| 3  | 7                                                          | 227.9327 | 0.0000  | 0.0000  | -0.8375 | -0.3000  | 0.0000  | 36.0000  | 0.1286 |        |
|    |                                                            |          | 0.3686  | -0.3500 | 25.0000 | 1.0000   | -0.1740 | 5.2057   | 0.0000 | 0.0000 |
| 4  | 7                                                          | 0.0000   | 0.0000  | 0.0000  | 1.0000  | 0.3000   | 0.0000  | 26.0000  | 1.0000 |        |
|    |                                                            |          | 0.5000  | 0.0000  | 12.0000 | 1.0000   | -0.2000 | 10.0000  | 0.0000 | 0.0000 |
| 6  | 7                                                          | 0.0000   | 0.0000  | 0.0000  | 1.0000  | 0.3000   | 0.0000  | 26.0000  | 1.0000 |        |
|    |                                                            |          | 0.5000  | 0.0000  | 12.0000 | 1.0000   | -0.2000 | 10.0000  | 0.0000 | 0.0000 |
| 7  | 7                                                          | 34.0777  | 0.0000  | 0.0000  | 0.4832  | -0.3000  | 0.0000  | 16.0000  | 0.5154 |        |
|    |                                                            |          | 6.4631  | -0.4197 | 14.3085 | 1.0000   | -0.1463 | 6.1608   | 0.0000 | 0.0000 |
| 17 | ! Nr of off-diagonal terms; Ediss;Ro;gamma;rsigma;rpi;rpi2 |          |         |         |         |          |         |          |        |        |
| 1  | 2                                                          | 0.1239   | 1.4004  | 9.8467  | 1.1210  | -1.0000  | -1.0000 |          |        |        |
| 2  | 3                                                          | 0.0283   | 1.2885  | 10.9190 | 0.9215  | -1.0000  | -1.0000 |          |        |        |
| 1  | 3                                                          | 0.1345   | 1.8422  | 9.7725  | 1.2835  | 1.1576   | 1.0637  |          |        |        |
| 1  | 4                                                          | 0.3999   | 1.4558  | 11.0036 | 1.3918  | -1.0000  | -1.0000 |          |        |        |
| 2  | 4                                                          | 0.0200   | 1.9451  | 10.8595 | 1.4157  | -1.0000  | -1.0000 |          |        |        |
| 3  | 4                                                          | 0.0502   | 1.3407  | 10.1767 | 1.7735  | -1.0000  | -1.0000 |          |        |        |
| 2  | 5                                                          | 0.0568   | 1.6740  | 9.6297  | 1.2200  | -1.0000  | -1.0000 |          |        |        |
| 3  | 5                                                          | 0.1927   | 2.2551  | 11.2308 | -1.0000 | -1.0000  | -1.0000 |          |        |        |
| 4  | 5                                                          | 0.1500   | 2.1500  | 11.0000 | -1.0000 | -1.0000  | -1.0000 |          |        |        |
| 1  | 6                                                          | 0.2000   | 1.9000  | 12.0000 | -1.0000 | -1.0000  | -1.0000 |          |        |        |
| 2  | 6                                                          | 0.1043   | 1.5000  | 11.8720 | 1.3005  | -1.0000  | -1.0000 |          |        |        |
| 3  | 6                                                          | 0.2000   | 1.9048  | 10.8374 | 1.7163  | 1.2444   | -1.0000 |          |        |        |
| 4  | 6                                                          | 0.1000   | 2.0000  | 11.0000 | -1.0000 | -1.0000  | -1.0000 |          |        |        |
| 1  | 7                                                          | 0.2000   | 1.9000  | 12.0000 | -1.0000 | -1.0000  | -1.0000 |          |        |        |
| 2  | 7                                                          | 0.0564   | 1.4937  | 12.0744 | 1.7276  | -1.0000  | -1.0000 |          |        |        |
| 3  | 7                                                          | 0.1745   | 1.8928  | 11.2476 | 1.5382  | -1.0000  | -1.0000 |          |        |        |
| 6  | 7                                                          | 0.0295   | 1.5025  | 11.8687 | -1.0000 | -1.0000  | -1.0000 |          |        |        |
| 66 | ! Nr of angles;at1;at2;at3;Thetao,o;ka;kb;pv1;pv2          |          |         |         |         |          |         |          |        |        |
| 1  | 1                                                          | 1        | 59.0573 | 30.7029 | 0.7606  | 0.0000   | 0.7180  | 6.2933   | 1.1244 |        |
| 1  | 1                                                          | 2        | 65.7758 | 14.5234 | 6.2481  | 0.0000   | 0.5665  | 0.0000   | 1.6255 |        |
| 2  | 1                                                          | 2        | 70.2607 | 25.2202 | 3.7312  | 0.0000   | 0.0050  | 0.0000   | 2.7500 |        |
| 1  | 2                                                          | 2        | 0.0000  | 0.0000  | 6.0000  | 0.0000   | 0.0000  | 0.0000   | 1.0400 |        |
| 1  | 2                                                          | 1        | 0.0000  | 3.4110  | 7.7350  | 0.0000   | 0.0000  | 0.0000   | 1.0400 |        |
| 2  | 2                                                          | 2        | 0.0000  | 27.9213 | 5.8635  | 0.0000   | 0.0000  | 0.0000   | 1.0400 |        |
| 1  | 1                                                          | 3        | 53.9517 | 7.8968  | 2.6122  | 0.0000   | 3.0000  | 58.6562  | 1.0338 |        |
| 3  | 1                                                          | 3        | 76.9627 | 44.2852 | 2.4177  | -25.3063 | 1.6334  | -50.0000 | 2.7392 |        |
| 2  | 1                                                          | 3        | 65.0000 | 16.3141 | 5.2730  | 0.0000   | 0.4448  | 0.0000   | 1.4077 |        |
| 1  | 3                                                          | 1        | 72.6199 | 42.5510 | 0.7205  | 0.0000   | 2.9294  | 0.0000   | 1.3096 |        |
| 1  | 3                                                          | 3        | 81.9029 | 32.2258 | 1.7397  | 0.0000   | 0.9888  | 68.1072  | 1.7777 |        |
| 3  | 3                                                          | 3        | 80.7324 | 30.4554 | 0.9953  | 0.0000   | 3.0000  | 50.0000  | 1.0783 |        |
| 1  | 3                                                          | 2        | 70.1101 | 13.1217 | 4.4734  | 0.0000   | 0.8433  | 0.0000   | 3.0000 |        |
| 2  | 3                                                          | 3        | 75.6935 | 50.0000 | 2.0000  | 0.0000   | 1.0000  | 0.0000   | 1.1680 |        |
| 2  | 3                                                          | 2        | 85.8000 | 9.8453  | 2.2720  | 0.0000   | 2.8635  | 0.0000   | 1.5800 |        |
| 1  | 2                                                          | 3        | 0.0000  | 25.0000 | 3.0000  | 0.0000   | 1.0000  | 0.0000   | 1.0400 |        |
| 3  | 2                                                          | 3        | 0.0000  | 15.0000 | 2.8900  | 0.0000   | 0.0000  | 0.0000   | 2.8774 |        |
| 2  | 2                                                          | 3        | 0.0000  | 8.5744  | 3.0000  | 0.0000   | 0.0000  | 0.0000   | 1.0421 |        |
| 1  | 4                                                          | 1        | 7.0546  | 39.3227 | 1.0694  | 0.0000   | 0.7210  | 0.0000   | 3.1133 |        |
| 1  | 1                                                          | 4        | 29.2291 | 39.0677 | 1.2584  | 0.0000   | 0.0100  | 0.0000   | 1.6263 |        |
| 1  | 4                                                          | 4        | 47.3783 | 1.0170  | 7.8341  | 0.0000   | 2.8546  | 0.0000   | 1.0000 |        |
| 4  | 1                                                          | 4        | 33.2812 | 34.6443 | 3.0111  | 0.0000   | 0.1701  | 0.0000   | 1.0510 |        |
| 2  | 1                                                          | 4        | 0.0100  | 25.4983 | 1.5660  | 0.0000   | 0.0839  | 0.0000   | 1.2521 |        |

|    |                                                               |   |          |          |         |         |         |         |        |
|----|---------------------------------------------------------------|---|----------|----------|---------|---------|---------|---------|--------|
| 2  | 4                                                             | 2 | 20.3683  | 0.0100   | 2.2825  | 0.0000  | 0.7660  | 0.0000  | 1.3788 |
| 2  | 2                                                             | 4 | 0.0000   | 0.0100   | 1.0568  | 0.0000  | 1.8595  | 0.0000  | 3.6142 |
| 4  | 2                                                             | 4 | 0.0000   | 10.4428  | 7.9607  | 0.0000  | 2.3717  | 0.0000  | 1.1970 |
| 2  | 4                                                             | 4 | 48.4128  | 4.0632   | 0.6773  | 0.0000  | 2.2274  | 0.0000  | 1.8605 |
| 2  | 4                                                             | 4 | 180.0000 | -5.3883  | 21.7804 | 0.0000  | 0.5866  | 0.0000  | 1.0000 |
| 1  | 3                                                             | 4 | 38.1871  | 14.3372  | 1.1301  | 0.0000  | 1.0108  | 0.0000  | 1.1000 |
| 3  | 1                                                             | 4 | 59.8640  | 25.0000  | 2.5000  | 0.0000  | 2.0000  | 0.0000  | 1.1000 |
| 3  | 4                                                             | 3 | 47.8282  | 0.0100   | 1.9197  | 0.0000  | 0.1248  | 0.0000  | 2.5839 |
| 4  | 3                                                             | 4 | 43.8679  | 14.3345  | 8.0000  | 0.0000  | 0.0636  | 0.0000  | 1.6997 |
| 2  | 3                                                             | 4 | 26.0012  | 49.6772  | 0.0500  | 0.0000  | 1.1589  | 0.0000  | 1.0000 |
| 3  | 3                                                             | 4 | 73.6721  | 32.6330  | 1.7223  | 0.0000  | 1.0221  | 0.0000  | 1.4351 |
| 3  | 4                                                             | 4 | 68.7142  | 3.0974   | 8.0000  | 0.0000  | 0.0907  | 0.0000  | 1.0000 |
| 3  | 2                                                             | 4 | 0.0000   | 0.0100   | 3.2567  | 0.0000  | 2.0582  | 0.0000  | 1.3513 |
| 2  | 4                                                             | 3 | 38.5594  | 11.2599  | 0.1898  | 0.0000  | 0.1904  | 0.0000  | 1.4041 |
| 3  | 2                                                             | 5 | 0.0000   | 0.0100   | 0.5211  | 0.0000  | 0.0000  | 0.0000  | 1.3859 |
| 1  | 4                                                             | 2 | 44.2808  | 0.3810   | 0.0100  | 0.0000  | 0.2603  | 0.0000  | 1.9721 |
| 1  | 2                                                             | 4 | 0.8171   | 0.0100   | 2.8321  | 0.0000  | 2.4786  | 0.0000  | 2.3245 |
| 6  | 6                                                             | 6 | 78.5339  | 36.4328  | 1.0067  | 0.0000  | 0.1694  | 0.0000  | 1.6608 |
| 2  | 6                                                             | 6 | 77.2616  | 5.0190   | 7.8944  | 0.0000  | 4.0000  | 0.0000  | 1.0400 |
| 2  | 6                                                             | 2 | 75.7983  | 14.4132  | 2.8640  | 0.0000  | 4.0000  | 0.0000  | 1.0400 |
| 3  | 6                                                             | 6 | 90.6812  | 31.1846  | 4.4543  | 0.0000  | 0.5073  | 0.0000  | 2.1809 |
| 2  | 6                                                             | 3 | 73.6998  | 40.0000  | 1.8782  | 0.0000  | 4.0000  | 0.0000  | 1.1290 |
| 3  | 6                                                             | 3 | 80.1361  | 36.2368  | 0.9504  | 0.0000  | 0.2624  | 0.0000  | 2.0787 |
| 6  | 3                                                             | 6 | 80.4450  | 6.0739   | 1.7731  | 0.0000  | 3.2548  | 0.0000  | 1.0422 |
| 2  | 3                                                             | 6 | 86.7611  | 7.1742   | 1.4013  | 0.0000  | 1.4999  | 0.0000  | 1.0400 |
| 3  | 3                                                             | 6 | 103.4529 | 26.9589  | 1.3470  | 0.0000  | 1.7728  | 0.0000  | 1.3091 |
| 2  | 2                                                             | 6 | 0.0000   | 47.1300  | 6.0000  | 0.0000  | 1.6371  | 0.0000  | 1.0400 |
| 6  | 2                                                             | 6 | 0.0000   | 27.4206  | 6.0000  | 0.0000  | 1.6371  | 0.0000  | 1.0400 |
| 3  | 2                                                             | 6 | 0.0000   | 5.0000   | 1.0000  | 0.0000  | 1.0000  | 0.0000  | 1.2500 |
| 3  | 2                                                             | 7 | 0.0000   | 4.2750   | 1.0250  | 0.0000  | 1.3750  | 0.0000  | 1.4750 |
| 2  | 2                                                             | 7 | 0.0000   | 3.0000   | 1.0000  | 0.0000  | 1.0000  | 0.0000  | 1.2500 |
| 7  | 2                                                             | 7 | 0.0000   | 20.2391  | 0.1328  | 0.0000  | 2.9860  | 0.0000  | 1.0870 |
| 2  | 3                                                             | 7 | 90.0000  | 19.7491  | 1.8227  | 0.0000  | 1.0000  | 0.0000  | 2.5337 |
| 3  | 3                                                             | 7 | 34.4326  | 25.9544  | 5.1239  | 0.0000  | 2.7500  | 0.0000  | 1.7141 |
| 7  | 3                                                             | 7 | 23.7270  | 19.5973  | 4.0000  | 0.0000  | 0.6619  | 0.0000  | 1.9380 |
| 2  | 7                                                             | 2 | 67.4229  | 4.5148   | 5.9702  | 0.0000  | 3.0000  | 0.0000  | 2.6879 |
| 2  | 7                                                             | 3 | 41.8108  | 17.3800  | 2.6618  | 0.0000  | 0.7372  | 0.0000  | 1.0100 |
| 3  | 7                                                             | 3 | 54.0864  | 9.7594   | 1.9476  | 0.0000  | 3.0000  | 0.0000  | 1.4400 |
| 2  | 7                                                             | 7 | 180.0000 | -26.7860 | 7.3549  | 0.0000  | 1.0000  | 0.0000  | 1.0252 |
| 2  | 7                                                             | 7 | 78.2279  | 37.6504  | 0.4809  | 0.0000  | 1.0000  | 0.0000  | 2.9475 |
| 6  | 3                                                             | 7 | 15.7093  | 0.0100   | 2.7033  | 0.0000  | 1.0000  | 0.0000  | 1.0000 |
| 3  | 6                                                             | 7 | 88.2703  | 0.3954   | 0.2500  | 0.0000  | 0.5000  | 0.0000  | 2.1060 |
| 3  | 7                                                             | 6 | 83.8306  | 0.3712   | 0.2500  | 0.0000  | 0.5000  | 0.0000  | 2.1153 |
| 33 | ! Nr of torsions;at1;at2;at3;at4;;V1;V2;V3;V2(BO);vconj;n.u;n |   |          |          |         |         |         |         |        |
| 1  | 1                                                             | 1 | 1        | -0.2500  | 34.7453 | 0.0288  | -6.3507 | -1.6000 | 0.0000 |
| 1  | 1                                                             | 1 | 2        | -0.2500  | 29.2131 | 0.2945  | -4.9581 | -2.1802 | 0.0000 |
| 2  | 1                                                             | 1 | 2        | -0.2500  | 31.2081 | 0.4539  | -4.8923 | -2.2677 | 0.0000 |
| 1  | 1                                                             | 1 | 3        | 1.2799   | 20.7787 | -0.5249 | -2.5000 | -1.0000 | 0.0000 |
| 2  | 1                                                             | 1 | 3        | 1.9159   | 19.8113 | 0.7914  | -4.6995 | -1.0000 | 0.0000 |
| 3  | 1                                                             | 1 | 3        | -1.4477  | 16.6853 | 0.6461  | -4.9622 | -1.0000 | 0.0000 |
| 1  | 1                                                             | 3 | 1        | 0.4816   | 19.6316 | -0.0057 | -2.5000 | -1.0000 | 0.0000 |
| 1  | 1                                                             | 3 | 2        | 1.2044   | 80.0000 | -0.3139 | -6.1481 | -1.0000 | 0.0000 |
| 2  | 1                                                             | 3 | 1        | -2.5000  | 31.0191 | 0.6165  | -2.7733 | -2.9807 | 0.0000 |
| 2  | 1                                                             | 3 | 2        | -2.4875  | 70.8145 | 0.7582  | -4.2274 | -3.0000 | 0.0000 |
| 1  | 1                                                             | 3 | 3        | -0.3566  | 10.0000 | 0.0816  | -2.6110 | -1.9631 | 0.0000 |
| 2  | 1                                                             | 3 | 3        | -1.4383  | 80.0000 | 1.0000  | -3.6877 | -2.8000 | 0.0000 |
| 3  | 1                                                             | 3 | 1        | -1.1390  | 78.0747 | -0.0964 | -4.5172 | -3.0000 | 0.0000 |

|   |                                                  |   |   |         |          |         |         |         |        |        |
|---|--------------------------------------------------|---|---|---------|----------|---------|---------|---------|--------|--------|
| 3 | 1                                                | 3 | 2 | -2.5000 | 70.3345  | -1.0000 | -5.5315 | -3.0000 | 0.0000 | 0.0000 |
| 3 | 1                                                | 3 | 3 | -2.0234 | 80.0000  | 0.1684  | -3.1568 | -2.6174 | 0.0000 | 0.0000 |
| 1 | 3                                                | 3 | 1 | 1.1637  | -17.3637 | 0.5459  | -3.6005 | -2.6938 | 0.0000 | 0.0000 |
| 1 | 3                                                | 3 | 2 | -2.1289 | 12.8382  | 1.0000  | -5.6657 | -2.9759 | 0.0000 | 0.0000 |
| 2 | 3                                                | 3 | 2 | 2.5000  | -22.9397 | 0.6991  | -3.3961 | -1.0000 | 0.0000 | 0.0000 |
| 1 | 3                                                | 3 | 3 | 2.5000  | -25.0000 | 1.0000  | -2.5000 | -1.0000 | 0.0000 | 0.0000 |
| 2 | 3                                                | 3 | 3 | -2.5000 | -2.5103  | -1.0000 | -2.5000 | -1.0000 | 0.0000 | 0.0000 |
| 3 | 3                                                | 3 | 3 | -2.5000 | -25.0000 | 1.0000  | -2.5000 | -1.0000 | 0.0000 | 0.0000 |
| 0 | 1                                                | 2 | 0 | 0.0000  | 0.0000   | 0.0000  | 0.0000  | 0.0000  | 0.0000 | 0.0000 |
| 0 | 2                                                | 2 | 0 | 0.0000  | 0.0000   | 0.0000  | 0.0000  | 0.0000  | 0.0000 | 0.0000 |
| 0 | 2                                                | 3 | 0 | 0.0000  | 0.1000   | 0.0200  | -2.5415 | 0.0000  | 0.0000 | 0.0000 |
| 0 | 1                                                | 1 | 0 | 0.0000  | 50.0000  | 0.3000  | -4.0000 | 0.0000  | 0.0000 | 0.0000 |
| 0 | 3                                                | 3 | 0 | 0.5511  | 25.4150  | 1.1330  | -5.1903 | -1.0000 | 0.0000 | 0.0000 |
| 1 | 1                                                | 3 | 3 | -0.0002 | 20.1851  | 0.1601  | -9.0000 | -2.0000 | 0.0000 | 0.0000 |
| 1 | 3                                                | 3 | 1 | 0.0002  | 80.0000  | -1.5000 | -4.4848 | -2.0000 | 0.0000 | 0.0000 |
| 3 | 1                                                | 3 | 3 | -0.1583 | 20.0000  | 1.5000  | -9.0000 | -2.0000 | 0.0000 | 0.0000 |
| 2 | 6                                                | 6 | 2 | 0.0000  | 0.0000   | 0.0640  | -2.4426 | 0.0000  | 0.0000 | 0.0000 |
| 2 | 6                                                | 6 | 6 | 0.0000  | 0.0000   | 0.1587  | -2.4426 | 0.0000  | 0.0000 | 0.0000 |
| 0 | 2                                                | 6 | 0 | 0.0000  | 0.0000   | 0.1200  | -2.4847 | 0.0000  | 0.0000 | 0.0000 |
| 2 | 1                                                | 4 | 4 | 0.0000  | 0.0000   | 0.0000  | -5.0000 | 0.0000  | 0.0000 | 0.0000 |
| 1 | ! Nr of hydrogen bonds;at1;at2;at3;Rhb;Dehb;vhb1 |   |   |         |          |         |         |         |        |        |
| 3 | 2                                                | 3 |   | 2.1200  | -3.5800  | 1.4500  | 19.5000 |         |        |        |
